# Supplementary material for: Metabolic differentiation of surface and invasive cells of yeast colony biofilms revealed by gene expression profiling
Source: PubMed Central journal article supplement (PMC5654107; doi:10.1186/s12864-017-4214-4), 2017-10-23
Supplement: 12864_2017_4214_MOESM1_ESM.pdf [file 12864_2017_4214_MOESM1_ESM.pdf]

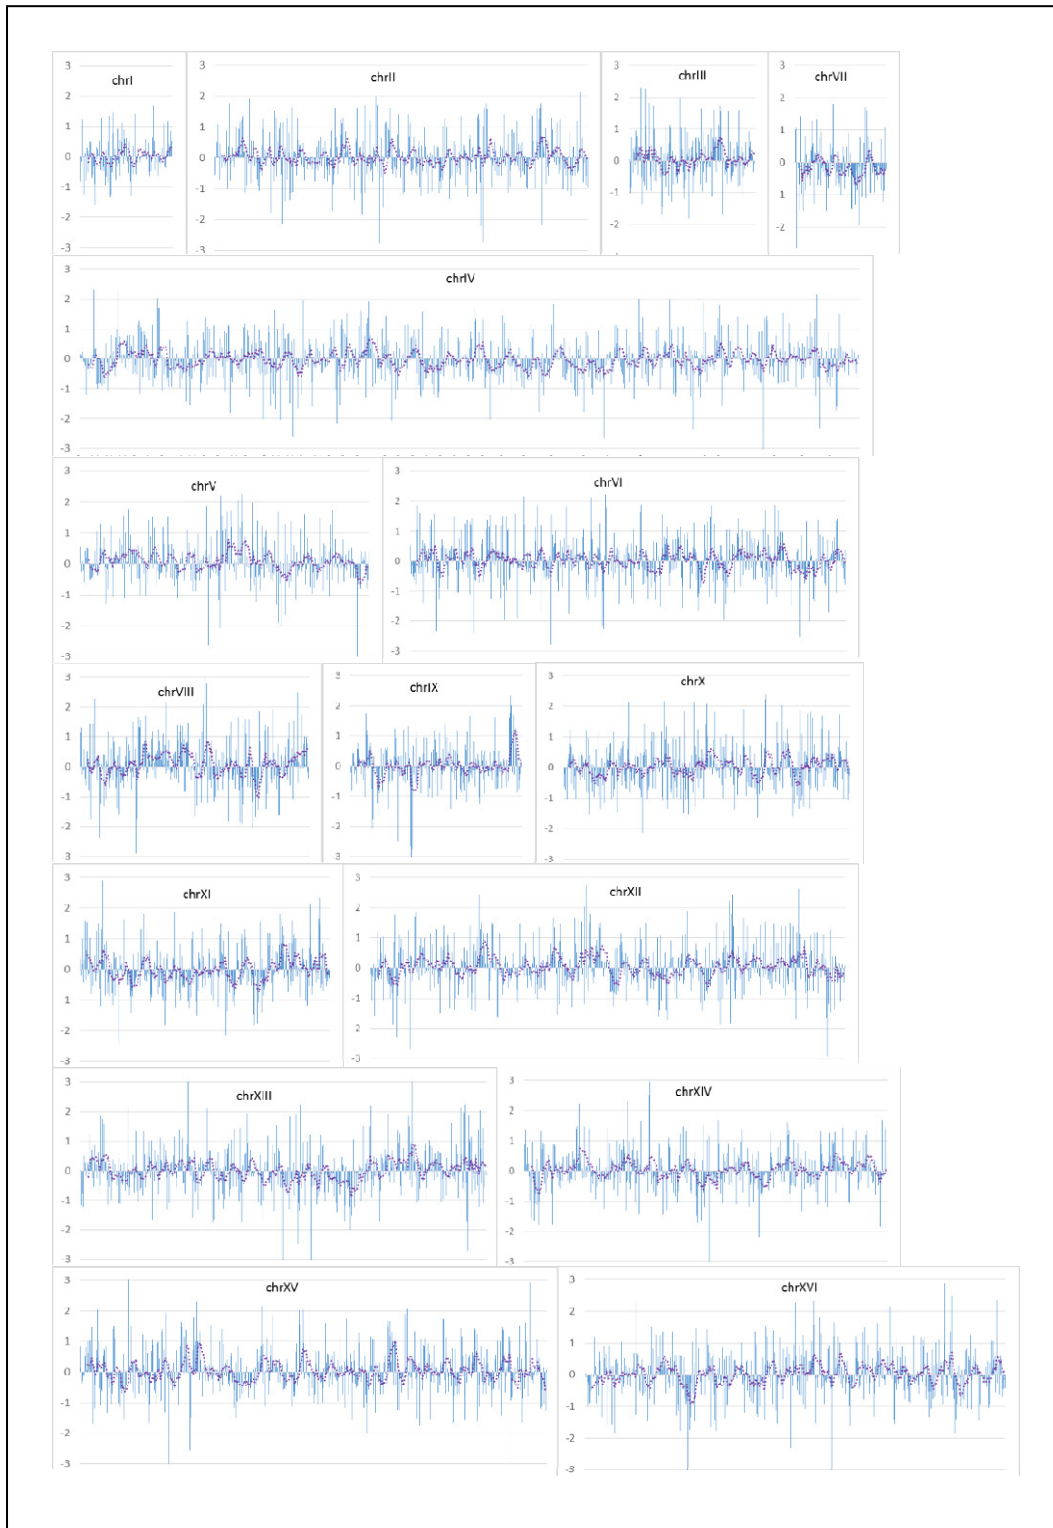

**Figure S1: Position clustering of differently expressed genes on chromosomes.** For individual chromosomes expression ratios (root/aerial) was plotted against the loci IDs and the moving log average (of 10 loci) was added to the plot as a trend line.

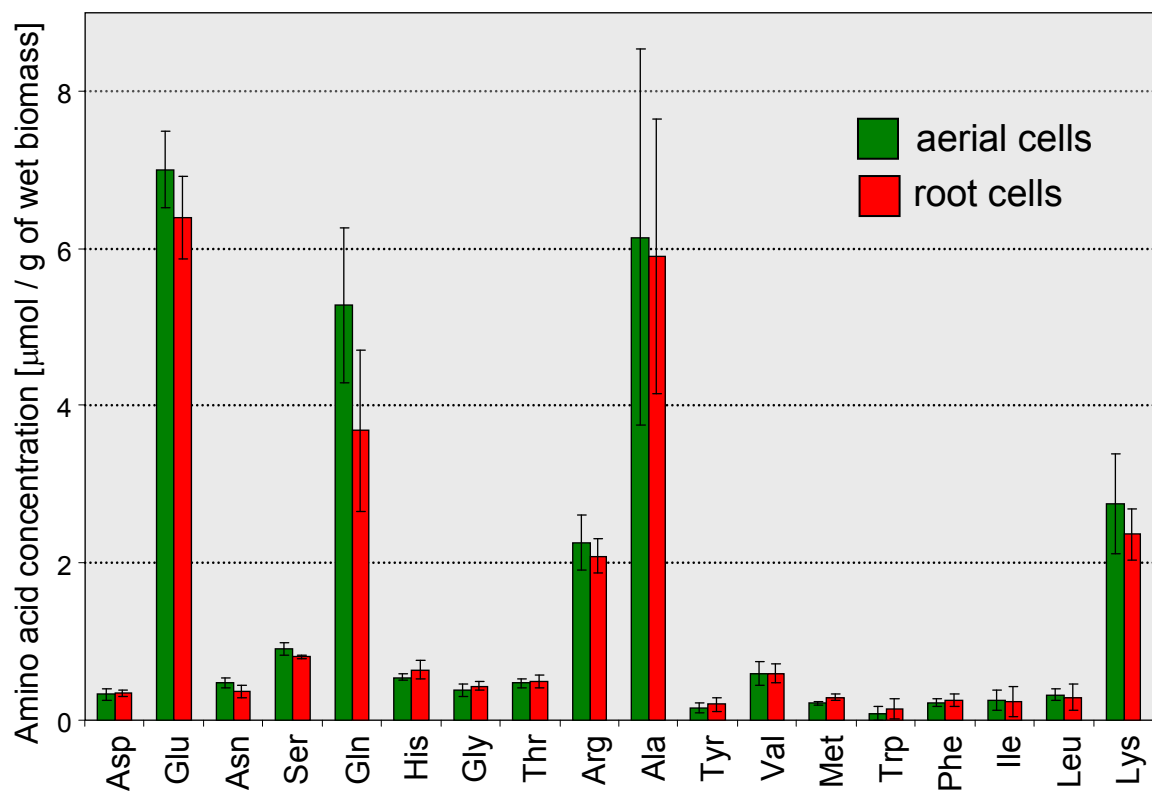

**Figure S2: Intracellular amino acids in aerial and root cells.** Concentrations of intracellular amino acid were compared in aerial (green) and root (red) cells by HPLC. Average values are shown of 8 independent biological replicates  $\pm$  S.D.
